# Supplementary material for: The beneficial effects of trifluoromethyl-substituents on the photoconversion efficiency of copper(i) dyes in dye-sensitized solar cells
Source: Royal Society of Chemistry journal article supplement (doi:10.1039/c5ra09590e), 2015-01-01
Supplement: c5ra09590e1.pdf [file c5ra09590e1.pdf]

## The beneficial effects of trifluoromethyl-substituents on the photoconversion efficiency of copper(I) dyes in dye-sensitized solar cells

Fabian Brunner,<sup>a</sup> Maximilian Klein,<sup>a</sup> Sarah Keller,<sup>a</sup> Collin D. Morris,<sup>a</sup> Alessandro Prescimone,<sup>a</sup> Edwin C. Constable<sup>a</sup> and Catherine E. Housecroft\*<sup>a</sup>

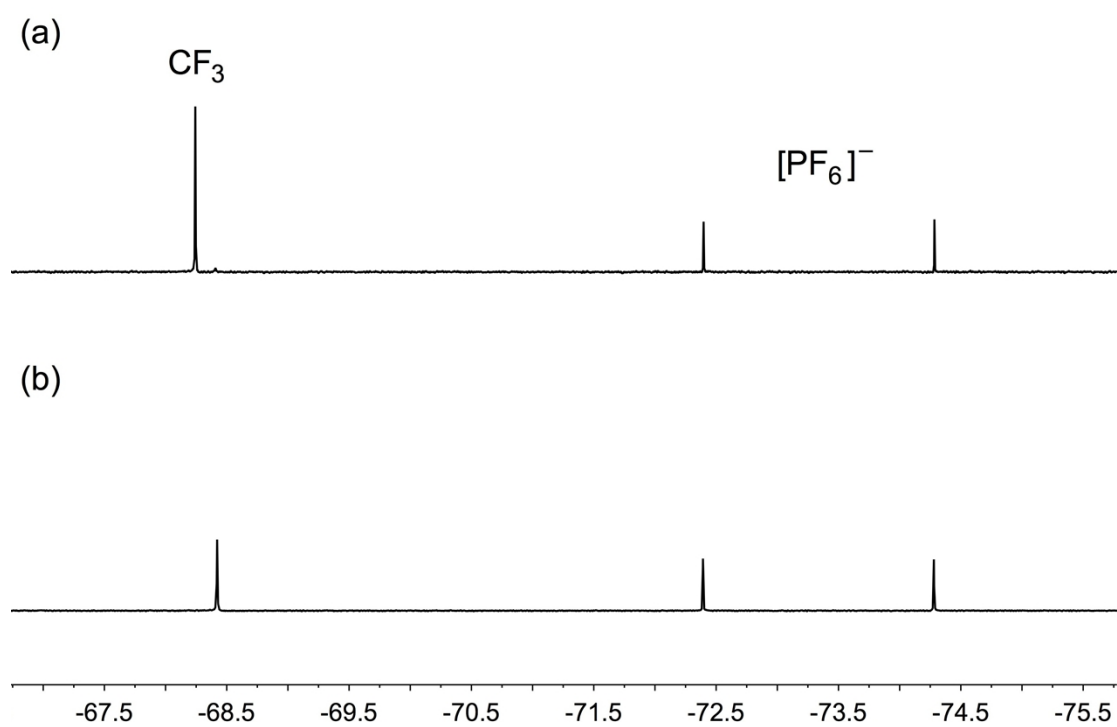

Fig. S1. 376 MHz <sup>19</sup>F NMR spectra of CD<sub>2</sub>Cl<sub>2</sub> solutions of (a) [Cu(2)<sub>2</sub>][PF<sub>6</sub>] and (b) [Cu(3)<sub>2</sub>][PF<sub>6</sub>]. Chemical shifts in δ/ ppm.

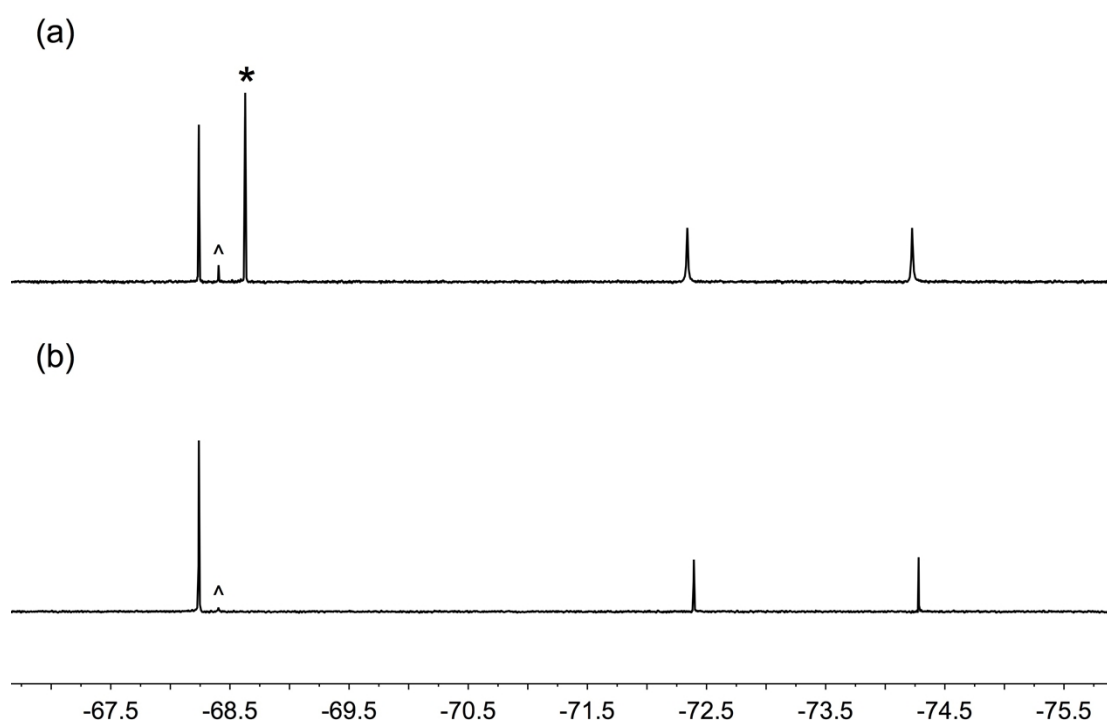

Fig. S2. 376 MHz  $^{19}\text{F}$  NMR spectra of  $\text{CD}_2\text{Cl}_2$  solutions of (a) a mixture of  $[\text{Cu}(\mathbf{1})_2][\text{PF}_6]$  and  $[\text{Cu}(\mathbf{2})_2][\text{PF}_6]$  and (b)  $[\text{Cu}(\mathbf{2})_2][\text{PF}_6]$ . The latter contains a small impurity of free ligand **2**, marked  $\wedge$ . In (a) the signal marked  $*$  arises from the heteroleptic complex  $[\text{Cu}(\mathbf{1})(\mathbf{2})]^+$ . The doublet centred at  $\delta = -73.3$  ppm is due to the  $[\text{PF}_6]^-$  ion. The initial solution for (a) contained 3 mg of each complex = 5.2 mmol  $[\text{Cu}(\mathbf{1})_2][\text{PF}_6]$  and 3.8 mmol  $[\text{Cu}(\mathbf{2})_2][\text{PF}_6]$ . Chemical shifts in  $\delta$ /ppm.
